# Supplementary material for: Proteome profiling of embryo chick retina
Source: PubMed Central journal article supplement (PMC2267454; doi:10.1186/1477-5956-6-3), 2008-01-22
Supplement: 1477-5956-6-3-S2.pdf [file 1477-5956-6-3-S2.pdf]

|     | ED7 (SEM)    | ED11 (SEM)   | ED15 (SEM)   |
|-----|--------------|--------------|--------------|
| S1  | 0 0          | 20708 (6013) | 3018 (5409)  |
| S2  | 385 (102)    | 5346 (1325)  | 1788 (520)   |
| S3  | 670 (207)    | 6464 (2000)  | 784 (2557)   |
| S4  | 3145 (312)   | 7551 (2798)  | 7269 (450)   |
| S5  | 11789 (2636) | 26450 (4146) | 19789 (2935) |
| S6  | 6518 (695)   | 3082 (446)   | 916 (1130)   |
| S7  | 10576 (1801) | 4297 (989)   | 7517 (1387)  |
| S8  | 11596 (2641) | 4737 (637)   | 7973 (1025)  |
| S9  | 13066 (5311) | 3139 (501)   | 5178 (3972)  |
| S10 | 7198 (1502)  | 958 (98)     | 4012 (674)   |
| S11 | 9433 (3126)  | 3340 (649)   | 13645 (1249) |
| S12 | 4152 (936)   | 11996 (3633) | 0 0          |
| S13 | 12134 (2690) | 27681 (6235) | 48942 (8493) |
